# Supplementary material for: Chokeberry Juice Containing Polyphenols Does Not Affect Cholesterol or Blood Pressure but Modifies the Composition of Plasma Phospholipids Fatty Acids in Individuals at Cardiovascular Risk
Source: PubMed Central journal article supplement (PMC6520894; doi:10.3390/nu11040850), 2019-04-15
Supplement: nutrients-11-00850-s001.pdf [file nutrients-11-00850-s001.pdf]

## Chokeberry juice containing polyphenols does not affect cholesterol or blood pressure but modifies the composition of plasma phospholipids fatty acids in individuals at cardiovascular risk

Biljana Pokimica<sup>1</sup>, María-Teresa García-Conesa<sup>2,\*</sup>, Manja Zec<sup>1</sup>, Jasmina Debeljak-Martačić<sup>1</sup>, Slavica Ranković<sup>1</sup>, Nevena Vidović<sup>1</sup>, Gordana Petrović-Oggiano<sup>1</sup>, Aleksandra Konić-Ristić<sup>1</sup>, and Maria Glibetić<sup>1</sup>

**Table S1.** Baseline characteristics of the sample population as distributed into the placebo (PLB) and chokeberry (AMJ and AMJ<sub>a</sub>) intervention groups.

|                                           | PLB (n=29)      | AMJ (n=27)      | AMJ <sub>a</sub> (n=28) | <i>p</i> -value<br>(between groups) |
|-------------------------------------------|-----------------|-----------------|-------------------------|-------------------------------------|
| <b>Age</b>                                |                 |                 |                         |                                     |
| Mean ± SD                                 | 39.00 ± 6.56    | 42.28 ± 7.45    | 40.75 ± 7.13            |                                     |
| 95% CI                                    | 36.61 – 41.39   | 39.45 – 45.10   | 38.11 – 43.39           | 0.25                                |
| CV (%)                                    | 16.83           | 17.72           | 17.49                   |                                     |
| <b>Sex (% women)</b>                      |                 |                 |                         |                                     |
|                                           | 48.3            | 62.9            | 75                      | -                                   |
| <b>Body mass index (Kg/m<sup>2</sup>)</b> |                 |                 |                         |                                     |
| Mean ± SD                                 | 28.02 ± 5.49    | 28.46 ± 4.09    | 28.40 ± 5.20            |                                     |
| 95% CI                                    | 26.02 – 30.02   | 26.92 – 30.00   | 26.47 – 30.32           | 0.82                                |
| CV (%)                                    | 19.59           | 14.35           | 18.31                   |                                     |
| <b>Systolic blood pressure (mm Hg)</b>    |                 |                 |                         |                                     |
| Mean ± SD                                 | 123.78 ± 20.37  | 125.89 ± 11.67  | 120.23 ± 9.78           |                                     |
| 95% CI                                    | 116.36 – 131.19 | 121.49 – 130.29 | 116.61 – 123.85         | 0.26                                |
| CV (%)                                    | 16.45           | 9.27            | 8.13                    |                                     |
| <b>Diastolic blood pressure (mm Hg)</b>   |                 |                 |                         |                                     |
| Mean ± SD                                 | 76.29 ± 13.60   | 79.09 ± 9.90    | 74.89 ± 9.68            |                                     |
| 95% CI                                    | 71.34 – 81.24   | 75.36 – 82.83   | 71.31 – 78.48           | 0.36                                |
| CV (%)                                    | 17.83           | 12.52           | 12.92                   |                                     |
| <b>Total cholesterol (mmol/L)</b>         |                 |                 |                         |                                     |
| Mean ± SD                                 | 5.41 ± 1.05     | 5.32 ± 1.09     | 5.11 ± 0.87             |                                     |
| 95% CI                                    | 5.03 – 5.79     | 4.91 – 5.72     | 4.79 – 5.43             | 0.44                                |
| CV (%)                                    | 19.48           | 20.43           | 17.04                   |                                     |
| <b>LDL cholesterol (mmol/L)</b>           |                 |                 |                         |                                     |
| Mean ± SD                                 | 3.77 ± 0.99     | 3.60 ± 1.08     | 3.40 ± 0.81             |                                     |
| 95% CI                                    | 3.41 – 4.13     | 3.19 – 4.01     | 3.10 – 3.70             | 0.26                                |
| CV (%)                                    | 26.22           | 30.11           | 23.66                   |                                     |
| <b>Triglycerides (mmol/L)</b>             |                 |                 |                         |                                     |
| Mean ± SD                                 | 1.44 ± 0.83     | 1.27 ± 0.73     | 1.07 ± 0.57             |                                     |
| 95% CI                                    | 1.14 – 1.75     | 0.99 – 1.55     | 0.85 – 1.28             | 0.05                                |
| CV (%)                                    | 57.38           | 57.61           | 53.52                   |                                     |
| <b>Fasting serum glucose (mmol/L)</b>     |                 |                 |                         |                                     |
| Mean ± SD                                 | 5.28 ± 0.80     | 4.94 ± 0.50     | 4.87 ± 0.52             |                                     |
| 95% CI                                    | 4.99 – 5.57     | 4.75 – 5.13     | 4.68 – 5.06             | 0.08                                |
| CV (%)                                    | 15.18           | 10.17           | 10.58                   |                                     |
| <b>oxLDL (ng/mL)</b>                      |                 |                 |                         |                                     |
| Mean ± SD                                 | 114.75 ± 32.66  | 131.00 ± 24.01  | 126.30 ± 21.74          |                                     |
| 95% CI                                    | 96.27 – 133.23  | 117.41 – 144.59 | 112.83 – 139.77         | 0.46                                |
| CV (%)                                    | 28.46           | 18.33           | 17.21                   |                                     |
| <b>oxLDL/total cholesterol (ng/mg)</b>    |                 |                 |                         |                                     |
| Mean ± SD                                 | 54.13 ± 16.62   | 62.77 ± 13.12   | 66.34 ± 14.01           |                                     |
| 95% CI                                    | 44.73 – 63.54   | 55.34 – 70.19   | 57.66 – 75.02           | 0.22                                |
| CV (%)                                    | 30.70           | 20.90           | 21.11                   |                                     |
| <b>oxLDL/LDL cholesterol (ng/mg)</b>      |                 |                 |                         |                                     |
| Mean ± SD                                 | 78.51 ± 26.61   | 91.54 ± 27.11   | 97.74 ± 27.04           |                                     |
| 95% CI                                    | 63.45 – 93.56   | 76.20 – 106.88  | 80.98 – 114.50          | 0.23                                |
| CV (%)                                    | 33.90           | 29.61           | 27.67                   |                                     |

Values are mean ± standard deviation (SD), 95% confidence interval (CI) and coefficient of variation (CV). Between groups differences were estimated by the non-parametric test of Kruskal-Wallis. All the *p*-values are indicated. LDL: low-density lipoprotein; oxLDL: oxidized low-density lipoprotein.

**Table S2.** Baseline waist circumference and HDL-cholesterol values in women and men as distributed in the three intervention subgroups: placebo (PLB) and chokeberry juices (AMJ and AMJ<sub>d</sub>).

| Women                                    | PLB (n=14)     | AMJ (n=17)     | AMJ <sub>d</sub> (n=21) | <i>p</i> -value<br>(between groups) |
|------------------------------------------|----------------|----------------|-------------------------|-------------------------------------|
| <b>Waist circumference (cm)</b>          |                |                |                         |                                     |
| Mean ± SD                                | 89.57 ± 16.63  | 90.18 ± 13.55  | 86.38 ± 10.21           | 0.86                                |
| 95% CI                                   | 80.86–98.28    | 83.73 – 96.62  | 82.01 – 90.75           |                                     |
| CV (%)                                   | 18.56          | 15.03          | 11.82                   |                                     |
| <b>HDL cholesterol (mmol/L)</b>          |                |                |                         |                                     |
| Mean ± SD                                | 1.86 ± 0.41    | 1.71 ± 0.54    | 1.78 ± 0.42             | 0.52                                |
| 95% CI                                   | 1.64 – 2.07    | 1.45 – 1.96    | 1.60 – 1.96             |                                     |
| CV (%)                                   | 22.10          | 31.66          | 23.87                   |                                     |
| <b>Total-cholesterol/HDL cholesterol</b> |                |                |                         |                                     |
| Mean ± SD                                | 3.14 ± 0.71    | 3.19 ± 0.90    | 3.02 ± 0.78             | 0.77                                |
| 95% CI                                   | 2.77 – 3.51    | 2.76 – 3.62    | 2.68 – 3.35             |                                     |
| CV (%)                                   | 22.65          | 28.21          | 25.86                   |                                     |
| <b>LDL-cholesterol/HDL-cholesterol</b>   |                |                |                         |                                     |
| Mean ± SD                                | 2.13 ± 0.64    | 2.11 ± 0.78    | 2.01 ± 0.70             | 0.83                                |
| 95% CI                                   | 1.80 – 2.47    | 1.74 – 2.47    | 1.71 – 2.31             |                                     |
| CV (%)                                   | 30.08          | 36.89          | 34.91                   |                                     |
| <b>Men</b>                               |                |                |                         |                                     |
| <b>Waist circumference (cm)</b>          |                |                |                         |                                     |
| Mean ± SD                                | 100.00 ± 8.47  | 100.80 ± 12.44 | 105.43 ± 7.21           | 0.36                                |
| 95% CI                                   | 95.71 – 104.29 | 93.45 – 108.15 | 100.09–110.77           |                                     |
| CV (%)                                   | 8.47           | 12.34          | 6.84                    |                                     |
| <b>HDL cholesterol (mmol/L)</b>          |                |                |                         |                                     |
| Mean ± SD                                | 1.26 ± 0.23    | 1.45 ± 0.43    | 1.45 ± 0.34             | 0.21                                |
| 95% CI                                   | 1.14 – 1.37    | 1.19 – 1.71    | 1.20 – 1.71             |                                     |
| CV (%)                                   | 18.17          | 29.43          | 23.70                   |                                     |
| <b>Total-cholesterol/HDL cholesterol</b> |                |                |                         |                                     |
| Mean ± SD                                | 4.29 ± 1.25    | 4.25 ± 1.68    | 3.60 ± 1.00             | 0.40                                |
| 95% CI                                   | 3.65 – 4.92    | 3.21 – 5.29    | 2.86 – 4.34             |                                     |
| CV (%)                                   | 29.23          | 39.44          | 27.73                   |                                     |
| <b>LDL-cholesterol/HDL-cholesterol</b>   |                |                |                         |                                     |
| Mean ± SD                                | 3.11 ± 1.16    | 3.05 ± 1.45    | 2.51 ± 0.88             | 0.31                                |
| 95% CI                                   | 2.52 – 3.70    | 2.15 – 3.95    | 1.85 – 3.16             |                                     |
| CV (%)                                   | 37.41          | 47.49          | 35.21                   |                                     |

Values are mean ± standard deviation (SD), 95% confidence interval (CI) and coefficient of variation (CV). Between groups differences were estimated by the non-parametric test of Kruskal-Wallis. All the *p*-values are indicated. HDL: high-density lipoprotein; LDL: low-density lipoprotein.

**Table S3.** Baseline plasma phospholipid fatty acid composition and desaturase activity for the three intervention groups: placebo (PLB) and chokeberry juices (AMJ and AMJ<sub>d</sub>).

|                                      | PLB (n=26)    | AMJ (n=27)    | AMJ <sub>d</sub> (n=27) | <i>p</i> -value<br>(between groups) |
|--------------------------------------|---------------|---------------|-------------------------|-------------------------------------|
| <b>Fatty acid composition</b>        |               |               |                         |                                     |
| <b>Palmitic acid, 16:0 (%)</b>       |               |               |                         |                                     |
| Mean ± SD                            | 30.88 ± 1.54  | 30.03 ± 2.56  | 30.29 ± 2.09            | 0.20                                |
| 95% CI                               | 30.29 – 31.48 | 29.06 – 30.99 | 29.50 – 31.08           |                                     |
| CV (%)                               | 5.00          | 8.52          | 6.90                    |                                     |
| <b>Palmitoleic acid, 16:1n-7 (%)</b> |               |               |                         |                                     |
| Mean ± SD                            | 0.64 ± 0.21   | 0.54 ± 0.18   | 0.58 ± 0.22             | 0.39                                |
| 95% CI                               | 0.56 – 0.72   | 0.47 – 0.61   | 0.50 – 0.67             |                                     |
| CV (%)                               | 32.36         | 33.93         | 38.29                   |                                     |
| <b>Stearic acid, 18:0 (%)</b>        |               |               |                         |                                     |
| Mean ± SD                            | 16.75 ± 1.32  | 17.05 ± 1.44  | 16.24 ± 1.52            | 0.12                                |
| 95% CI                               | 16.24 – 17.26 | 16.51 – 17.60 | 15.66 – 16.81           |                                     |
| CV (%)                               | 7.86          | 8.44          | 9.38                    |                                     |

|                                               |               |               |               |      |
|-----------------------------------------------|---------------|---------------|---------------|------|
| Oleic acid, 18:1n-9 (%)                       |               |               |               |      |
| Mean ± SD                                     | 8.03 ± 1.07   | 7.99 ± 1.51   | 7.92 ± 1.14   |      |
| 95% CI                                        | 7.62 – 8.45   | 7.42 – 8.55   | 7.49 – 8.35   | 0.96 |
| CV (%)                                        | 13.30         | 18.86         | 14.35         |      |
| Vaccenic acid, 18:1n-7 (%)                    |               |               |               |      |
| Mean ± SD                                     | 2.40 ± 0.42   | 2.46 ± 0.57   | 2.37 ± 0.60   |      |
| 95% CI                                        | 2.24 – 2.57   | 2.24 – 2.67   | 2.15 – 2.60   | 0.47 |
| CV (%)                                        | 17.38         | 23.33         | 25.10         |      |
| Linoleic acid, 18:2n-6 (%)                    |               |               |               |      |
| Mean ± SD                                     | 23.17 ± 2.78  | 23.62 ± 3.38  | 24.96 ± 3.48  |      |
| 95% CI                                        | 22.10 – 24.24 | 22.35 – 24.90 | 23.65 – 26.28 | 0.15 |
| CV (%)                                        | 12.01         | 14.29         | 13.96         |      |
| Dihomo- $\gamma$ -linolenic acid, 20:3n-6 (%) |               |               |               |      |
| Mean ± SD                                     | 3.00 ± 0.84   | 3.10 ± 1.07   | 2.83 ± 0.87   |      |
| 95% CI                                        | 2.67 – 3.32   | 2.69 – 3.50   | 2.50 – 3.16   | 0.64 |
| CV (%)                                        | 28.12         | 34.64         | 30.65         |      |
| Arachidonic acid, 20:4n-6 (%)                 |               |               |               |      |
| Mean ± SD                                     | 10.52 ± 1.99  | 11.19 ± 2.32  | 10.81 ± 1.77  |      |
| 95% CI                                        | 9.75 – 11.29  | 10.32 – 12.07 | 10.14 – 11.48 | 0.74 |
| CV (%)                                        | 18.95         | 20.70         | 16.40         |      |
| Eicosapentaenoic acid, 20:5n-3 (%)            |               |               |               |      |
| Mean ± SD                                     | 0.44 ± 0.26   | 0.32 ± 0.16   | 0.35 ± 0.23   |      |
| 95% CI                                        | 0.34 – 0.54   | 0.26 – 0.38   | 0.26 – 0.44   | 0.10 |
| CV (%)                                        | 59.36         | 49.31         | 65.67         |      |
| Adrenic acid, 22:4n-6 (%)                     |               |               |               |      |
| Mean ± SD                                     | 0.41 ± 0.13   | 0.46 ± 0.17   | 0.45 ± 0.18   |      |
| 95% CI                                        | 0.36 – 0.46   | 0.39 – 0.52   | 0.38 – 0.52   | 0.59 |
| CV (%)                                        | 31.63         | 36.95         | 40.81         |      |
| Docosapentaenoic acid, 22:5n-3 (%)            |               |               |               |      |
| Mean ± SD                                     | 0.63 ± 0.23   | 0.57 ± 0.13   | 0.51 ± 0.16   |      |
| 95% CI                                        | 0.54 – 0.71   | 0.52 – 0.62   | 0.45 – 0.57   | 0.22 |
| CV (%)                                        | 36.91         | 22.30         | 31.65         |      |
| Docosahexaenoic acid, 22:6n-3 (%)             |               |               |               |      |
| Mean ± SD                                     | 3.12 ± 0.86   | 2.76 ± 0.86   | 2.68 ± 0.92   |      |
| 95% CI                                        | 2.79 – 3.45   | 2.43 – 3.08   | 2.33 – 3.03   | 0.11 |
| CV (%)                                        | 27.59         | 31.32         | 34.28         |      |
| Ratio Arachidonic/Eicosapentaenoic acid       |               |               |               |      |
| Mean ± SD                                     | 30.35 ± 18.06 | 41.46 ± 17.38 | 45.25 ± 29.89 |      |
| 95% CI                                        | 23.41 – 37.29 | 34.90 – 48.02 | 33.98 – 56.53 | 0.04 |
| CV (%)                                        | 59.50         | 41.92         | 66.04         |      |
| Ratio Arachidonic/Docosahexaenoic acid        |               |               |               |      |
| Mean ± SD                                     | 3.57 ± 0.93   | 4.40 ± 1.43   | 4.48 ± 1.61   |      |
| 95% CI                                        | 3.21 – 3.92   | 3.85 – 4.94   | 3.87 – 5.09   | 0.08 |
| CV (%)                                        | 25.99         | 32.64         | 36.06         |      |
| Ratio n-6/n-3 polyunsaturated fatty acids     |               |               |               |      |
| Mean ± SD                                     | 9.57±2.84     | 11.29±3.42    | 11.97±3.61    |      |
| 95% CI                                        | 8.42– 10.71   | 9.94 – 12.64  | 10.54 – 13.39 | 0.04 |
| CV (%)                                        | 29.28         | 30.28         | 30.16         |      |
| Total saturated fatty acids (%)               |               |               |               |      |
| Mean ± SD                                     | 47.63 ± 2.08  | 47.08 ± 2.90  | 46.53 ± 3.01  |      |
| 95% CI                                        | 46.83 – 48.43 | 45.99 – 48.18 | 45.39 – 47.66 | 0.17 |
| CV (%)                                        | 4.37          | 6.17          | 6.47          |      |
| Total monounsaturated fatty acids (%)         |               |               |               |      |
| Mean ± SD                                     | 11.08 ± 1.16  | 10.98 ± 1.34  | 10.87 ± 1.45  |      |
| 95% CI                                        | 10.63 – 11.52 | 10.47 – 11.49 | 10.33 – 11.42 | 0.98 |
| CV (%)                                        | 10.51         | 12.21         | 13.33         |      |
| Total polyunsaturated fatty acids (%)         |               |               |               |      |
| Mean ± SD                                     | 41.29 ± 2.17  | 42.02 ± 3.04  | 42.60 ± 3.11  |      |
| 95% CI                                        | 40.46 – 42.12 | 40.87 – 43.16 | 41.43 – 43.77 | 0.14 |
| CV (%)                                        | 5.25          | 7.23          | 7.29          |      |
| Total n-3 polyunsaturated fatty acids (%)     |               |               |               |      |
| Mean ± SD                                     | 4.19 ± 1.16   | 3.65 ± 0.95   | 3.54 ± 1.06   |      |
| 95% CI                                        | 3.74 – 4.63   | 3.29 – 4.00   | 3.14 – 3.94   | 0.08 |
| CV (%)                                        | 27.69         | 26.16         | 29.89         |      |
| Total n-6 polyunsaturated fatty acids (%)     |               |               |               |      |
| Mean ± SD                                     | 37.10 ± 2.25  | 38.37 ± 2.63  | 39.06 ± 3.10  |      |

|                                    |               |               |               |      |
|------------------------------------|---------------|---------------|---------------|------|
| 95% CI                             | 36.24 – 37.97 | 37.38 – 39.37 | 37.89 – 40.23 | 0.02 |
| CV (%)                             | 6.07          | 6.87          | 7.94          |      |
| <b>Desaturase activity</b>         |               |               |               |      |
| <b>Delta-5 desaturase activity</b> |               |               |               |      |
| Mean ± SD                          | 3.88 ± 1.58   | 4.05 ± 1.60   | 4.20 ± 1.53   |      |
| 95% CI                             | 3.27 – 4.48   | 3.44 – 4.65   | 3.62 – 4.78   | 0.75 |
| CV (%)                             | 40.70         | 39.51         | 36.39         |      |
| <b>Delta-6 desaturase activity</b> |               |               |               |      |
| Mean ± SD                          | 0.13 ± 0.05   | 0.14 ± 0.06   | 0.12 ± 0.05   |      |
| 95% CI                             | 0.12 – 0.15   | 0.11 – 0.16   | 0.10 – 0.14   | 0.35 |
| CV (%)                             | 34.48         | 42.51         | 40.01         |      |

Values are mean ± standard deviation (SD), 95% confidence interval (CI) and coefficient of variation (CV). Between groups differences were estimated by the non-parametric test of Kruskal-Wallis. All the *p*-values are indicated.

**Table S4.** Overall changes in the levels of the main biomarkers examined in this study in the placebo (PLB) and chokeberry (AMJ and AMJ<sub>a</sub>) intervention groups.

|                                      | PLB (n=29)      |                  |                |               | AMJ (n=27)      |                  |                |               | AMJ <sub>a</sub> (n=28) |                  |                |               | BG<br>p-value |
|--------------------------------------|-----------------|------------------|----------------|---------------|-----------------|------------------|----------------|---------------|-------------------------|------------------|----------------|---------------|---------------|
|                                      | Baseline        | End of treatment | Δ              | IG<br>p-value | Baseline        | End of treatment | Δ              | IG<br>p-value | Baseline                | End of treatment | Δ              | IG<br>p-value |               |
| Body mass index (Kg/m <sup>2</sup> ) |                 |                  |                |               |                 |                  |                |               |                         |                  |                |               |               |
| Mean ± SD                            | 28.02 ± 5.49    | 27.94 ± 5.60     | -0.08 ± 0.36   | 0.40          | 28.46 ± 4.09    | 28.28 ± 4.15     | -0.18 ± 0.44   | 0.06          | 28.40 ± 5.20            | 28.33 ± 5.22     | -0.07 ± 0.43   | 0.58          | 0.86          |
| 95% CI                               | 26.02 – 30.02   | 25.86 – 30.01    | -0.21 – 0.05   |               | 26.92 – 30.00   | 26.71 – 29.85    | -0.35 – -0.01  |               | 26.47 – 30.32           | 26.39 – 30.26    | -0.23 – 0.09   |               |               |
| CV (%)                               | 19.59           | 20.06            |                |               | 14.35           | 14.69            |                |               | 18.31                   | 18.44            |                |               |               |
| Systolic blood pressure (mm Hg)      |                 |                  |                |               |                 |                  |                |               |                         |                  |                |               |               |
| Mean ± SD                            | 123.78 ± 20.37  | 118.48 ± 18.55   | -5.50 ± 7.24   | 0.001         | 125.89 ± 11.67  | 116.98 ± 12.34   | -8.91 ± 10.73  | 0.000         | 120.23 ± 9.78           | 116.95 ± 11.73   | -3.29 ± 8.86   | 0.06          | 0.96          |
| 95% CI                               | 116.36 – 131.19 | 111.61 – 125.35  | -8.18 – -2.82  |               | 121.49 – 130.29 | 112.33 – 121.64  | -12.96 – -4.86 |               | 116.61 – 123.85         | 112.60 – 121.29  | -6.57 – -0.003 |               |               |
| CV (%)                               | 16.45           | 15.66            |                |               | 9.27            | 10.55            |                |               | 8.13                    | 10.03            |                |               |               |
| Diastolic blood pressure (mm Hg)     |                 |                  |                |               |                 |                  |                |               |                         |                  |                |               |               |
| Mean ± SD                            | 76.29 ± 13.60   | 73.41 ± 13.36    | -3.14 ± 5.77   | 0.006         | 79.09 ± 9.90    | 73.94 ± 10.14    | -5.15 ± 8.22   | 0.002         | 74.89 ± 9.68            | 72.75 ± 9.92     | -2.14 ± 6.19   | 0.05          | 0.89          |
| 95% CI                               | 71.34 – 81.24   | 68.46 – 78.36    | -5.28 – -1.01  |               | 75.36 – 82.83   | 70.12 – 77.77    | -8.25 – -2.05  |               | 71.31 – 78.48           | 69.08 – 76.42    | -4.44 – 0.15   |               |               |
| CV (%)                               | 17.83           | 18.20            |                |               | 12.52           | 13.72            |                |               | 12.92                   | 13.64            |                |               |               |
| Total cholesterol (mmol/L)           |                 |                  |                |               |                 |                  |                |               |                         |                  |                |               |               |
| Mean ± SD                            | 5.41 ± 1.05     | 5.37 ± 0.75      | -0.07 ± 0.56   | 0.39          | 5.32 ± 1.09     | 5.29 ± 1.10      | -0.03 ± 0.51   | 0.74          | 5.11 ± 0.87             | 5.06 ± 1.00      | -0.05 ± 0.45   | 0.35          | 0.46          |
| 95% CI                               | 5.03 – 5.79     | 5.09 – 5.64      | -0.27 – 0.14   |               | 4.91 – 5.72     | 4.87 – 5.70      | -0.22 – 0.16   |               | 4.79 – 5.43             | 4.69 – 5.43      | -0.22 – 0.12   |               |               |
| CV (%)                               | 19.48           | 13.97            |                |               | 20.43           | 20.74            |                |               | 17.04                   | 19.80            |                |               |               |
| LDL-cholesterol (mmol/L)             |                 |                  |                |               |                 |                  |                |               |                         |                  |                |               |               |
| Mean ± SD                            | 3.77 ± 0.99     | 3.69 ± 0.69      | -0.08 ± 0.59   | 0.49          | 3.60 ± 1.08     | 3.61 ± 1.06      | 0.02 ± 0.51    | 0.86          | 3.40 ± 0.81             | 3.39 ± 1.00      | -0.01 ± 0.49   | 0.93          | 0.32          |
| 95% CI                               | 3.41 – 4.13     | 3.44 – 3.95      | -0.30 – 0.13   |               | 3.19 – 4.01     | 3.22 – 4.01      | -0.17 – 0.20   |               | 3.10 – 3.70             | 3.02 – 3.76      | -0.19 – 0.17   |               |               |
| CV (%)                               | 26.22           | 18.77            |                |               | 30.11           | 29.20            |                |               | 23.66                   | 29.39            |                |               |               |
| Triglycerides (mmol/L)               |                 |                  |                |               |                 |                  |                |               |                         |                  |                |               |               |
| Mean ± SD                            | 1.44 ± 0.83     | 1.57 ± 1.02      | 0.12 ± 0.55    | 0.20          | 1.27 ± 0.73     | 1.26 ± 0.79      | -0.01 ± 0.58   | 0.78          | 1.07 ± 0.57             | 1.05 ± 0.56      | -0.01 ± 0.35   | 0.88          | 0.10          |
| 95% CI                               | 1.14 – 1.75     | 1.20 – 1.95      | -0.08 – 0.33   |               | 0.99 – 1.55     | 0.97 – 1.56      | -0.23 – 0.21   |               | 0.85 – 1.28             | 0.85 – 1.26      | -0.14 – 0.12   |               |               |
| CV (%)                               | 57.8            | 64.55            |                |               | 57.61           | 62.23            |                |               | 53.52                   | 53.39            |                |               |               |
| Fasting serum glucose (mmol/L)       |                 |                  |                |               |                 |                  |                |               |                         |                  |                |               |               |
| Mean ± SD                            | 5.28 ± 0.80     | 5.29 ± 0.75      | -0.01 ± 0.33   | 0.37          | 4.94 ± 0.50     | 5.08 ± 0.55      | 0.14 ± 0.41    | 0.08          | 4.87 ± 0.52             | 4.97 ± 0.69      | 0.09 ± 0.42    | 0.45          | 0.11          |
| 95% CI                               | 4.99 – 5.57     | 5.01 – 5.57      | -0.13 – 0.11   |               | 4.75 – 5.13     | 4.88 – 5.29      | -0.02 – 0.29   |               | 4.68 – 5.06             | 4.71 – 5.22      | -0.06 – 0.25   |               |               |
| CV (%)                               | 15.18           | 14.19            |                |               | 10.17           | 10.73            |                |               | 10.58                   | 13.94            |                |               |               |
| oxLDL (ng/mL)                        |                 |                  |                |               |                 |                  |                |               |                         |                  |                |               |               |
| Mean ± SD                            | 114.75 ± 32.66  | 108.58 ± 32.25   | -6.17 ± 53.69  | 0.53          | 131.00 ± 24.01  | 110.58 ± 17.75   | -20.42 ± 26.45 | 0.02          | 126.30 ± 21.74          | 119.20 ± 30.67   | -7.10 ± 40.63  | 0.65          | 0.58          |
| 95% CI                               | 96.27 – 133.23  | 90.34 – 126.83   | -36.54 – 24.21 |               | 117.41 – 144.59 | 100.54 – 120.63  | -35.38 – -5.45 |               | 112.83 – 139.77         | 100.19 – 138.21  | -32.28 – 18.08 |               |               |
| CV (%)                               | 28.46           | 29.70            |                |               | 18.33           | 16.05            |                |               | 17.21                   | 25.73            |                |               |               |
| oxLDL/total cholesterol (ng/mg)      |                 |                  |                |               |                 |                  |                |               |                         |                  |                |               |               |
| Mean ± SD                            | 54.13 ± 16.62   | 52.11 ± 16.88    | -2.02 ± 23.66  | 0.58          | 62.77 ± 13.12   | 51.92 ± 14.31    | -10.84 ± 12.80 | 0.02          | 66.34 ± 14.01           | 66.35 ± 30.55    | 0.01 ± 27.06   | 0.96          | 0.52          |
| 95% CI                               | 44.73 – 63.54   | 42.56 – 61.66    | -15.41 – 11.37 |               | 55.34 – 70.19   | 43.83 – 60.02    | -18.09 – -3.60 |               | 57.66 – 75.02           | 47.41 – 85.29    | -16.76 – 16.78 |               |               |
| Median                               | 53.16           | 53.62            | -3.44          |               | 65.70           | 45.79            | -9.49          |               | 65.84                   | 58.42            | -10.11         |               |               |
| CV (%)                               | 30.70           | 32.39            |                |               | 20.90           | 27.56            |                |               | 21.11                   | 46.05            |                |               |               |
| oxLDL/LDL cholesterol (ng/mg)        |                 |                  |                |               |                 |                  |                |               |                         |                  |                |               |               |

|           |               |               |                |      |                |               |                |      |                |                |                |      |      |
|-----------|---------------|---------------|----------------|------|----------------|---------------|----------------|------|----------------|----------------|----------------|------|------|
| Mean ± SD | 78.51 ± 26.61 | 76.14 ± 25.69 | -2.36 ± 34.66  | 0.69 | 91.54 ± 27.11  | 73.35 ± 20.96 | -18.19 ± 19.98 | 0.01 | 97.74 ± 27.04  | 107.70 ± 64.23 | 9.96 ± 55.56   | 0.80 | 0.48 |
| 95% CI    | 63.45 – 93.56 | 61.61 – 90.68 | -21.97 – 17.25 |      | 76.20 – 106.88 | 61.49 – 85.21 | -29.50 – -6.89 |      | 80.98 – 114.50 | 67.89 – 147.51 | -24.48 – 44.40 |      |      |
| CV (%)    | 33.90         | 33.73         |                |      | 29.61          | 28.58         |                |      | 27.67          | 59.63          |                |      |      |

Values are mean ± standard deviation (SD), 95% confidence interval (CI) and coefficient of variation (CV). Change ( $\Delta$ ) is post-baseline. Intragroup differences (IG) were estimated by the non-parametric Wilcoxon test and between groups (BG) differences were estimated by the non-parametric Kruskal-Wallis test. All the *p*-values are indicated. LDL: low-density lipoprotein; oxLDL: oxidized low-density lipoprotein.

**Table S5.** Changes in the waist circumference and HDL-cholesterol values of women and men in the three intervention subgroups: placebo (PLB) and chokeberry juices (AMJ and AMJd).

|                                 | PLB            |                  |                |                    | AMJ            |                  |               |                    | AMJ <sub>d</sub>        |                  |               |                    | BG <i>p</i> -value |
|---------------------------------|----------------|------------------|----------------|--------------------|----------------|------------------|---------------|--------------------|-------------------------|------------------|---------------|--------------------|--------------------|
|                                 | Baseline       | End of treatment | $\Delta$       | IG <i>p</i> -value | Baseline       | End of treatment | $\Delta$      | IG <i>p</i> -value | Baseline                | End of treatment | $\Delta$      | IG <i>p</i> -value |                    |
| <b>Women</b>                    | PLB (n=14)     |                  |                |                    | AMJ (n=17)     |                  |               |                    | AMJ <sub>d</sub> (n=21) |                  |               |                    |                    |
| <b>Waist circumference (cm)</b> |                |                  |                |                    |                |                  |               |                    |                         |                  |               |                    |                    |
| Mean ± SD                       | 89.57 ± 16.63  | 88.86 ± 16.06    | -0.71 ± 4.76   | 0.09               | 90.18 ± 13.55  | 89.35 ± 13.21    | -0.82 ± 2.79  | 0.28               | 86.38 ± 10.21           | 85.38 ± 10.05    | -1.00 ± 2.32  | 0.07               | 0.72               |
| 95% CI                          | 80.86 – 98.28  | 80.45 – 97.27    | -3.21 – 1.78   |                    | 83.73 – 96.62  | 83.07 – 95.63    | -2.15 – 0.50  |                    | 82.01 – 90.75           | 81.08 – 89.68    | -1.99 – -0.01 |                    |                    |
| CV (%)                          | 18.56          | 18.07            |                |                    | 15.03          | 14.78            |               |                    | 11.82                   | 11.77            |               |                    |                    |
| <b>HDL cholesterol (mmol/L)</b> |                |                  |                |                    |                |                  |               |                    |                         |                  |               |                    |                    |
| Mean ± SD                       | 1.86 ± 0.41    | 1.77 ± 0.44      | -0.09 ± 0.24   | 0.21               | 1.71 ± 0.54    | 1.69 ± 0.51      | -0.01 ± 0.17  | 0.42               | 1.78 ± 0.42             | 1.65 ± 0.45      | -0.13 ± 0.22  | 0.02               | 0.57               |
| 95% CI                          | 1.64 – 2.07    | 1.54 – 2.00      | -0.21 – 0.04   |                    | 1.45 – 1.96    | 1.45 – 1.94      | -0.09 – 0.07  |                    | 1.60 – 1.96             | 1.46 – 1.85      | -0.22 – -0.03 |                    |                    |
| CV (%)                          | 22.10          | 24.75            |                |                    | 31.66          | 30.41            |               |                    | 23.87                   | 27.45            |               |                    |                    |
| <b>Total cholesterol/HDL</b>    |                |                  |                |                    |                |                  |               |                    |                         |                  |               |                    |                    |
| Mean ± SD                       | 3.14 ± 0.71    | 3.20 ± 0.70      | 0.06 ± 0.36    | 0.64               | 3.19 ± 0.90    | 3.15 ± 1.01      | -0.04 ± 0.38  | 0.59               | 3.02 ± 0.78             | 3.21 ± 0.98      | 0.20 ± 0.53   | 0.11               | 0.86               |
| 95% CI                          | 2.77 – 3.51    | 2.83 – 3.57      | -0.12 – 0.25   |                    | 2.76 – 3.62    | 2.68 – 3.63      | -0.22 – 0.14  |                    | 2.68 – 3.35             | 2.79 – 3.63      | -0.03 – 0.42  |                    |                    |
| CV (%)                          | 22.65          | 21.87            |                |                    | 28.21          | 31.91            |               |                    | 25.86                   | 30.52            |               |                    |                    |
| <b>LDL/HDL</b>                  |                |                  |                |                    |                |                  |               |                    |                         |                  |               |                    |                    |
| Mean ± SD                       | 2.13 ± 0.64    | 2.18 ± 0.66      | 0.05 ± 0.32    | 0.55               | 2.11 ± 0.78    | 2.11 ± 0.89      | 0.001 ± 0.36  | 0.87               | 2.01 ± 0.70             | 2.13 ± 0.87      | 0.12 ± 0.39   | 0.16               | 0.79               |
| 95% CI                          | 1.80 – 2.47    | 1.84 – 2.53      | -0.12 – 0.22   |                    | 1.74 – 2.47    | 1.68 – 2.53      | -0.17 – 0.17  |                    | 1.71 – 2.31             | 1.76 – 2.50      | -0.04 – 0.29  |                    |                    |
| CV (%)                          | 30.08          | 30.09            |                |                    | 36.89          | 42.08            |               |                    | 34.91                   | 40.81            |               |                    |                    |
| <b>Men</b>                      | PLB (n=15)     |                  |                |                    | AMJ (n=10)     |                  |               |                    | AMJ <sub>d</sub> (n=7)  |                  |               |                    |                    |
| <b>Waist circumference (cm)</b> |                |                  |                |                    |                |                  |               |                    |                         |                  |               |                    |                    |
| Mean ± SD                       | 100.00 ± 8.47  | 98.71 ± 9.40     | -1.29 ± 1.98   | 0.04               | 100.80 ± 12.44 | 99.00 ± 11.66    | -1.80 ± 2.86  | 0.08               | 105.43 ± 7.21           | 103.86 ± 8.88    | -1.57 ± 3.36  | 0.38               | 0.45               |
| 95% CI                          | 95.71 – 104.29 | 93.79 – 103.64   | -2.32 – -0.25  |                    | 93.45 – 108.15 | 92.11 – 105.89   | -3.49 – -0.11 |                    | 100.09 – 110.77         | 97.28 – 110.43   | -4.06 – 0.92  |                    |                    |
| CV (%)                          | 8.47           | 9.52             |                |                    | 12.34          | 11.78            |               |                    | 6.84                    | 8.55             |               |                    |                    |
| <b>HDL cholesterol (mmol/L)</b> |                |                  |                |                    |                |                  |               |                    |                         |                  |               |                    |                    |
| Mean ± SD                       | 1.26 ± 0.23    | 1.18 ± 0.22      | -0.08 ± 0.15   | 0.03               | 1.45 ± 0.43    | 1.39 ± 0.38      | -0.07 ± 0.19  | 0.44               | 1.45 ± 0.34             | 1.36 ± 0.30      | -0.09 ± 0.14  | 0.11               | 0.31               |
| 95% CI                          | 1.14 – 1.37    | 1.06 – 1.30      | -0.15 – 0.0005 |                    | 1.19 – 1.71    | 1.15 – 1.62      | -0.19 – 0.06  |                    | 1.20 – 1.71             | 1.13 – 1.58      | -0.20 – 0.01  |                    |                    |

|                       |             |             |              |      |             |             |              |      |             |             |              |      |      |
|-----------------------|-------------|-------------|--------------|------|-------------|-------------|--------------|------|-------------|-------------|--------------|------|------|
| CV (%)                | 18.17       | 19.01       |              |      | 29.43       | 27.53       |              |      | 23.70       | 22.43       |              |      |      |
| Total cholesterol/HDL |             |             |              |      |             |             |              |      |             |             |              |      |      |
| Mean ± SD             | 4.29 ± 1.25 | 4.66 ± 1.14 | 0.33 ± 0.67  | 0.06 | 4.25 ± 1.68 | 4.53 ± 1.68 | 0.28 ± 1.09  | 0.72 | 3.60 ± 1.00 | 3.87 ± 0.82 | 0.26 ± 0.68  | 0.31 | 0.31 |
| 95% CI                | 3.65 – 4.92 | 4.06 – 5.25 | -0.02 – 0.68 |      | 3.21 – 5.29 | 3.49 – 5.58 | -0.40 – 0.96 |      | 2.86 – 4.34 | 3.26 – 4.47 | -0.24 – 0.77 |      |      |
| CV (%)                | 29.23       | 24.52       |              |      | 39.44       | 37.04       |              |      | 27.73       | 21.25       |              |      |      |
| LDL/HDL               |             |             |              |      |             |             |              |      |             |             |              |      |      |
| Mean ± SD             | 3.11 ± 1.16 | 3.30 ± 0.88 | 0.16 ± 0.64  | 0.27 | 3.05 ± 1.45 | 3.30 ± 1.29 | 0.25 ± 0.81  | 0.33 | 2.51 ± 0.88 | 2.73 ± 0.79 | 0.22 ± 0.57  | 0.31 | 0.38 |
| 95% CI                | 2.52 – 3.70 | 2.84 – 3.76 | -0.17 – 0.50 |      | 2.15 – 3.95 | 2.50 – 4.10 | -0.25 – 0.75 |      | 1.85 – 3.16 | 2.14 – 3.32 | -0.21 – 0.64 |      |      |
| CV (%)                | 37.41       | 26.79       |              |      | 47.49       | 39.10       |              |      | 35.21       | 29.14       |              |      |      |

Values are mean ± standard deviations (SD), 95% confidence intervals (CI) and the coefficient of variation (CV). Change ( $\Delta$ ) is post-baseline. Intragroup (IG) differences were estimated by the non-parametric Wilcoxon test and between groups (BG) differences were estimated by the non-parametric Kruskal-Wallis test. All the *p*-values are indicated. LDL: low-density lipoprotein; HDL: high-density lipoprotein.

**Table S6.** Changes in the levels of plasma phospholipids fatty acids and desaturase activities in the placebo (PLB) and chokeberry (AMJ and AMJ<sub>a</sub>) intervention groups.

|                               | PLB (n=26)    |                  |              |                    | AMJ (n=27)    |                  |              |                    | AMJ <sub>a</sub> (n=27) |                  |               |                    | BG <i>p</i> -value |
|-------------------------------|---------------|------------------|--------------|--------------------|---------------|------------------|--------------|--------------------|-------------------------|------------------|---------------|--------------------|--------------------|
|                               | Baseline      | End of treatment | $\Delta$     | IG <i>p</i> -value | Baseline      | End of treatment | $\Delta$     | IG <i>p</i> -value | Baseline                | End of treatment | $\Delta$      | IG <i>p</i> -value |                    |
| Palmitic acid, 16:0 (%)       |               |                  |              |                    |               |                  |              |                    |                         |                  |               |                    |                    |
| Mean ± SD                     | 30.88 ± 1.54  | 30.75 ± 1.19     | -0.14 ± 2.18 | 0.77               | 30.03 ± 2.56  | 31.35 ± 1.25     | 1.32 ± 2.67  | 0.01               | 30.29 ± 2.09            | 31.36 ± 1.43     | 1.07 ± 2.15   | 0.005              | 0.10               |
| 95% CI                        | 30.29 – 31.48 | 30.29 – 31.20    | -0.97 – 0.70 |                    | 29.06 – 30.99 | 30.87 – 31.82    | 0.31 – 2.33  |                    | 29.50 – 31.08           | 30.82 – 31.90    | 0.26 – 1.88   |                    |                    |
| CV (%)                        | 5.00          | 3.87             |              |                    | 8.52          | 3.99             |              |                    | 6.90                    | 4.57             |               |                    |                    |
| Palmitoleic acid, 16:1n-7 (%) |               |                  |              |                    |               |                  |              |                    |                         |                  |               |                    |                    |
| Mean ± SD                     | 0.64 ± 0.21   | 0.54 ± 0.16      | -0.10 ± 0.28 | 0.14               | 0.54 ± 0.18   | 0.52 ± 0.20      | -0.02 ± 0.23 | 0.56               | 0.58 ± 0.22             | 0.54 ± 0.24      | -0.05 ± 0.29  | 0.12               | 0.74               |
| 95% CI                        | 0.56 – 0.72   | 0.48 – 0.60      | -0.20 – 0.01 |                    | 0.47 – 0.61   | 0.44 – 0.59      | -0.11 – 0.06 |                    | 0.50 – 0.67             | 0.45 – 0.63      | -0.16 – 0.07  |                    |                    |
| CV (%)                        | 32.36         | 30.59            |              |                    | 33.93         | 39.31            |              |                    | 38.29                   | 43.88            |               |                    |                    |
| Stearic acid, 18:0 (%)        |               |                  |              |                    |               |                  |              |                    |                         |                  |               |                    |                    |
| Mean ± SD                     | 16.75 ± 1.32  | 17.55 ± 1.56     | 0.80 ± 1.77  | 0.05               | 17.05 ± 1.44  | 17.83 ± 1.43     | 0.77 ± 1.38  | 0.002              | 16.24 ± 1.52            | 17.60 ± 1.47     | 1.36 ± 2.14   | 0.005              | 0.91               |
| 95% CI                        | 16.24 – 17.26 | 16.94 – 18.15    | 0.12 – 1.47  |                    | 16.51 – 17.60 | 17.29 – 18.37    | 0.25 – 1.30  |                    | 15.66 – 16.81           | 17.05 – 18.16    | 0.56 – 2.17   |                    |                    |
| CV (%)                        | 7.86          | 8.91             |              |                    | 8.44          | 8.02             |              |                    | 9.38                    | 8.35             |               |                    |                    |
| Oleic acid, 18:1n-9 (%)       |               |                  |              |                    |               |                  |              |                    |                         |                  |               |                    |                    |
| Mean ± SD                     | 8.03 ± 1.07   | 7.30 ± 1.72      | -0.74 ± 1.82 | 0.02               | 7.99 ± 1.51   | 7.76 ± 1.37      | -0.23 ± 1.99 | 0.65               | 7.92 ± 1.14             | 7.76 ± 1.60      | -0.16 ± 1.53  | 0.08               | 0.25               |
| 95% CI                        | 7.62 – 8.45   | 6.63 – 7.96      | -1.44 – 0.04 |                    | 7.42 – 8.55   | 7.24 – 8.27      | -0.98 – 0.52 |                    | 7.49 – 8.35             | 7.15 – 8.37      | -0.73 – 0.42  |                    |                    |
| CV (%)                        | 13.30         | 23.61            |              |                    | 18.86         | 17.66            |              |                    | 14.35                   | 20.68            |               |                    |                    |
| Vaccenic acid, 18:1n-7 (%)    |               |                  |              |                    |               |                  |              |                    |                         |                  |               |                    |                    |
| Mean ± SD                     | 2.40 ± 0.42   | 2.86 ± 0.61      | 0.46 ± 0.64  | 0.002              | 2.46 ± 0.57   | 2.71 ± 0.52      | 0.25 ± 0.83  | 0.18               | 2.37 ± 0.60             | 2.75 ± 0.71      | 0.38 ± 1.02   | 0.06               | 0.45               |
| 95% CI                        | 2.24 – 2.57   | 2.63 – 3.10      | 0.21 – 0.70  |                    | 2.24 – 2.67   | 2.51 – 2.91      | -0.06 – 0.57 |                    | 2.15 – 2.60             | 2.49 – 3.02      | -0.003 – 0.77 |                    |                    |
| CV (%)                        | 17.38         | 21.48            |              |                    | 23.33         | 19.34            |              |                    | 25.10                   | 25.71            |               |                    |                    |

|                                           |               |               |               |      |               |               |               |       |               |               |                |       |      |
|-------------------------------------------|---------------|---------------|---------------|------|---------------|---------------|---------------|-------|---------------|---------------|----------------|-------|------|
| Linoleic acid, 18:2n-6 (%)                |               |               |               |      |               |               |               |       |               |               |                |       |      |
| Mean ± SD                                 | 23.17 ± 2.78  | 23.32 ± 2.53  | 0.15 ± 2.74   | 0.68 | 23.62 ± 3.38  | 22.64 ± 2.77  | -0.98 ± 2.87  | 0.06  | 24.96 ± 3.48  | 22.99 ± 2.01  | -1.97 ± 2.50   | 0.001 | 0.74 |
| 95% CI                                    | 22.10 – 24.24 | 22.35 – 24.29 | -0.90 – 1.20  |      | 22.35 – 24.90 | 21.59 – 23.68 | -2.07 – 0.10  |       | 23.65 – 26.28 | 22.23 – 23.75 | -2.92 – -1.03  |       |      |
| CV (%)                                    | 12.01         | 10.83         |               |      | 14.29         | 12.23         |               |       | 13.96         | 8.74          |                |       |      |
| Dihomo-γ linolenic acid, 20:3n-6 (%)      |               |               |               |      |               |               |               |       |               |               |                |       |      |
| Mean ± SD                                 | 3.00 ± 0.84   | 2.76 ± 0.93   | -0.24 ± 0.91  | 0.34 | 3.10 ± 1.07   | 2.67 ± 0.82   | -0.42 ± 0.77  | 0.007 | 2.83 ± 0.87   | 2.68 ± 0.83   | -0.15 ± 0.78   | 0.22  | 0.91 |
| 95% CI                                    | 2.67 – 3.32   | 2.40 – 3.11   | -0.59 – 0.11  |      | 2.69 – 3.50   | 2.36 – 2.98   | -0.71 – -0.13 |       | 2.50 – 3.16   | 2.36 – 2.99   | -0.45 – 0.14   |       |      |
| CV (%)                                    | 28.12         | 33.73         |               |      | 34.64         | 30.83         |               |       | 30.65         | 31.02         |                |       |      |
| Arachidonic acid, 20:4n-6 (%)             |               |               |               |      |               |               |               |       |               |               |                |       |      |
| Mean ± SD                                 | 10.52 ± 1.99  | 10.39 ± 2.41  | -0.13 ± 2.62  | 0.34 | 11.19 ± 2.32  | 10.37 ± 2.14  | -0.83 ± 1.15  | 0.002 | 10.81 ± 1.77  | 10.11 ± 1.83  | -0.70 ± 2.09   | 0.06  | 0.91 |
| 95% CI                                    | 9.75 – 11.29  | 9.47 – 11.32  | -1.13 – 0.88  |      | 10.32 – 12.07 | 9.56 – 11.17  | -1.26 – -0.39 |       | 10.14 – 11.48 | 9.42 – 10.80  | -1.49 – 0.09   |       |      |
| CV (%)                                    | 18.95         | 23.20         |               |      | 20.70         | 20.69         |               |       | 16.40         | 18.14         |                |       |      |
| Eicosapentaenoic acid, 20:5n-3 (%)        |               |               |               |      |               |               |               |       |               |               |                |       |      |
| Mean ± SD                                 | 0.44 ± 0.26   | 0.50 ± 0.22   | 0.06 ± 0.25   | 0.17 | 0.32 ± 0.16   | 0.49 ± 0.39   | 0.17 ± 0.41   | 0.07  | 0.35 ± 0.23   | 0.44 ± 0.20   | 0.09 ± 0.28    | 0.05  | 0.43 |
| 95% CI                                    | 0.34 – 0.54   | 0.42 – 0.59   | -0.04 – 0.16  |      | 0.26 – 0.38   | 0.35 – 0.64   | 0.02 – 0.33   |       | 0.26 – 0.44   | 0.37 – 0.52   | -0.01 – 0.20   |       |      |
| CV (%)                                    | 59.36         | 44.04         |               |      | 49.31         | 78.58         |               |       | 65.67         | 45.38         |                |       |      |
| Adrenic acid, 22:4n-6 (%)                 |               |               |               |      |               |               |               |       |               |               |                |       |      |
| Mean ± SD                                 | 0.41 ± 0.13   | 0.36 ± 0.15   | -0.06 ± 0.18  | 0.07 | 0.46 ± 0.17   | 0.37 ± 0.13   | -0.09 ± 0.15  | 0.004 | 0.45 ± 0.18   | 0.37 ± 0.16   | -0.08 ± 0.25   | 0.05  | 0.63 |
| 95% CI                                    | 0.36 – 0.46   | 0.30 – 0.42   | -0.12 – 0.01  |      | 0.39 – 0.54   | 0.32 – 0.42   | -0.15 – -0.03 |       | 0.38 – 0.52   | 0.31 – 0.43   | -0.17 – 0.02   |       |      |
| CV (%)                                    | 31.63         | 41.69         |               |      | 36.95         | 36.40         |               |       | 40.81         | 43.72         |                |       |      |
| Docosapentaenoic acid, 22:5n-3 (%)        |               |               |               |      |               |               |               |       |               |               |                |       |      |
| Mean ± SD                                 | 0.63 ± 0.23   | 0.56 ± 0.29   | -0.07 ± 0.26  | 0.12 | 0.57 ± 0.13   | 0.50 ± 0.18   | -0.07 ± 0.17  | 0.06  | 0.51 ± 0.16   | 0.57 ± 0.51   | 0.05 ± 0.50    | 0.55  | 0.80 |
| 95% CI                                    | 0.54 – 0.71   | 0.45 – 0.67   | -0.17 – 0.03  |      | 0.52 – 0.62   | 0.43 – 0.57   | -0.14 – -0.01 |       | 0.45 – 0.57   | 0.38 – 0.76   | -0.14 – 0.24   |       |      |
| CV (%)                                    | 36.91         | 52.43         |               |      | 22.30         | 36.62         |               |       | 31.65         | 89.43         |                |       |      |
| Docosahexaenoic acid, 22:6n-3 (%)         |               |               |               |      |               |               |               |       |               |               |                |       |      |
| Mean ± SD                                 | 3.12 ± 0.86   | 3.11 ± 0.99   | -0.01 ± 0.59  | 0.60 | 2.76 ± 0.86   | 2.81 ± 0.96   | 0.06 ± 1.13   | 0.61  | 2.68 ± 0.92   | 2.80 ± 0.93   | 0.12 ± 1.04    | 0.43  | 0.50 |
| 95% CI                                    | 2.79 – 3.45   | 2.72 – 3.49   | -0.24 – 0.21  |      | 2.43 – 3.08   | 2.45 – 3.17   | -0.37 – 0.48  |       | 2.33 – 3.03   | 2.45 – 3.15   | -0.27 – 0.52   |       |      |
| CV (%)                                    | 27.59         | 31.97         |               |      | 31.32         | 34.12         |               |       | 34.28         | 33.15         |                |       |      |
| Ratio Arachidonic/Eicosapentaenoic acid   |               |               |               |      |               |               |               |       |               |               |                |       |      |
| Mean ± SD                                 | 30.35 ± 18.06 | 24.18 ± 10.38 | -6.17 ± 20.09 | 0.16 | 41.46 ± 17.38 | 31.88 ± 25.21 | -9.58 ± 27.83 | 0.03  | 45.25 ± 29.89 | 28.55 ± 15.96 | -16.70 ± 32.71 | 0.008 | 0.51 |
| 95% CI                                    | 23.41 – 37.29 | 20.19 – 28.17 | -13.89 – 1.55 |      | 34.90 – 48.02 | 22.37 – 41.39 | -20.08 – 0.92 |       | 33.98 – 56.53 | 22.53 – 34.57 | -29.04 – -4.36 |       |      |
| CV (%)                                    | 59.50         | 42.95         |               |      | 41.92         | 79.07         |               |       | 66.04         | 55.91         |                |       |      |
| Ratio Arachidonic/Docosahexaenoic acid    |               |               |               |      |               |               |               |       |               |               |                |       |      |
| Mean ± SD                                 | 3.57 ± 0.93   | 3.62 ± 1.23   | 0.05 ± 0.85   | 0.95 | 4.40 ± 1.43   | 4.09 ± 1.61   | -0.31 ± 1.90  | 0.34  | 4.48 ± 1.61   | 3.97 ± 1.47   | -0.50 ± 1.55   | 0.10  | 0.77 |
| 95% CI                                    | 3.21 – 3.92   | 3.15 – 4.09   | -0.27 – 0.38  |      | 3.85 – 4.94   | 3.48 – 4.69   | -1.03 – 0.41  |       | 3.87 – 5.09   | 3.42 – 4.53   | -1.09 – 0.08   |       |      |
| CV (%)                                    | 25.99         | 33.91         |               |      | 32.64         | 39.30         |               |       | 36.06         | 37.09         |                |       |      |
| Ratio n-6/n-3 polyunsaturated fatty acids |               |               |               |      |               |               |               |       |               |               |                |       |      |
| Mean ± SD                                 | 9.57 ± 2.84   | 9.70 ± 3.41   | 0.13 ± 1.84   | 0.60 | 11.29 ± 3.42  | 10.51 ± 3.44  | -0.78 ± 4.59  | 0.40  | 11.97 ± 3.61  | 10.55 ± 3.42  | -1.41 ± 3.61   | 0.06  | 0.46 |
| 95% CI                                    | 8.42 – 10.71  | 8.32 – 11.07  | -0.61 – 0.87  |      | 9.94 – 12.64  | 9.15 – 11.87  | -2.59 – 1.04  |       | 10.54 – 13.39 | 9.20 – 11.91  | -2.84 – 0.01   |       |      |
| CV (%)                                    | 29.28         | 34.44         |               |      | 30.28         | 32.73         |               |       | 30.16         | 32.42         |                |       |      |
| Total saturated fatty acids (%)           |               |               |               |      |               |               |               |       |               |               |                |       |      |
| Mean ± SD                                 | 47.63 ± 2.08  | 48.29 ± 2.31  | 0.66 ± 3.59   | 0.32 | 47.08 ± 2.90  | 49.17 ± 1.50  | 2.09 ± 3.56   | 0.005 | 46.53 ± 3.01  | 48.96 ± 1.75  | 2.44 ± 3.74    | 0.002 | 0.65 |
| 95% CI                                    | 46.83 – 48.43 | 47.40 – 49.18 | -0.72 – 2.04  |      | 45.99 – 48.18 | 48.61 – 49.74 | 0.75 – 3.44   |       | 45.39 – 47.66 | 48.30 – 49.62 | 1.02 – 3.85    |       |      |
| CV (%)                                    | 4.37          | 4.79          |               |      | 6.17          | 3.05          |               |       | 6.47          | 3.57          |                |       |      |
| Total monounsaturated fatty acids (%)     |               |               |               |      |               |               |               |       |               |               |                |       |      |



|                                           |               |               |               |      |               |               |               |        |               |               |               |        |      |
|-------------------------------------------|---------------|---------------|---------------|------|---------------|---------------|---------------|--------|---------------|---------------|---------------|--------|------|
| Mean ± SD                                 | 11.08 ± 1.16  | 10.70 ± 1.74  | -0.38 ± 2.12  | 0.29 | 10.98 ± 1.34  | 10.98 ± 1.46  | 0.001 ± 1.89  | 0.96   | 10.87 ± 1.45  | 11.05 ± 1.66  | 0.18 ± 1.84   | 0.85   | 0.69 |
| 95% CI                                    | 10.63 – 11.52 | 10.03 – 11.37 | -1.19 – 0.43  |      | 10.47 – 11.49 | 10.43 – 11.53 | -0.71 – 0.71  |        | 10.33 – 11.42 | 10.43 – 11.68 | -0.51 – 0.87  |        |      |
| CV (%)                                    | 10.51         | 16.26         |               |      | 12.21         | 13.28         |               |        | 13.33         | 15.02         |               |        |      |
| Total polyunsaturated fatty acids (%)     |               |               |               |      |               |               |               |        |               |               |               |        |      |
| Mean ± SD                                 | 41.29 ± 2.17  | 40.99 ± 2.25  | -0.30 ± 3.23  | 0.57 | 42.02 ± 3.04  | 39.85 ± 1.25  | -2.17 ± 3.06  | 0.001  | 42.60 ± 3.11  | 39.96 ± 1.89  | -2.64 ± 3.64  | 0.001  | 0.36 |
| 95% CI                                    | 40.46 – 42.12 | 40.13 – 41.86 | -1.54 – 0.95  |      | 40.87 – 43.16 | 39.38 – 40.32 | -3.32 – -1.01 |        | 41.43 – 43.77 | 39.25 – 40.68 | -4.01 – -1.26 |        |      |
| CV (%)                                    | 5.25          | 5.49          |               |      | 7.23          | 3.13          |               |        | 7.29          | 4.74          |               |        |      |
| Total n-3 polyunsaturated fatty acids (%) |               |               |               |      |               |               |               |        |               |               |               |        |      |
| Mean ± SD                                 | 4.19 ± 1.16   | 4.17 ± 1.21   | -0.02 ± 0.74  | 0.87 | 3.65 ± 0.95   | 3.80 ± 1.28   | 0.16 ± 1.35   | 0.94   | 3.54 ± 1.06   | 3.81 ± 1.32   | 0.27 ± 1.37   | 0.25   | 0.29 |
| 95% CI                                    | 3.74 – 4.63   | 3.70 – 4.63   | -0.30 – 0.26  |      | 3.29 – 4.00   | 3.32 – 4.28   | -0.35 – 0.67  |        | 3.14 – 3.94   | 3.32 – 4.31   | -0.25 – 0.79  |        |      |
| CV (%)                                    | 27.69         | 29.03         |               |      | 26.16         | 33.57         |               |        | 29.89         | 34.55         |               |        |      |
| Total n-6 polyunsaturated fatty acids (%) |               |               |               |      |               |               |               |        |               |               |               |        |      |
| Mean ± SD                                 | 37.10 ± 2.25  | 36.83 ± 2.19  | -0.28 ± 3.20  | 0.68 | 38.37 ± 2.63  | 36.05 ± 1.29  | -2.33 ± 2.93  | 0.0005 | 39.06 ± 3.10  | 36.15 ± 1.89  | -2.91 ± 3.37  | 0.0005 | 0.62 |
| 95% CI                                    | 36.24 – 37.97 | 35.98 – 37.67 | -1.51 – 0.96  |      | 37.38 – 39.37 | 35.56 – 36.53 | -3.43 – -1.22 |        | 37.89 – 40.23 | 35.44 – 36.86 | -4.18 – -1.63 |        |      |
| CV (%)                                    | 6.07          | 5.96          |               |      | 6.87          | 3.57          |               |        | 7.94          | 5.23          |               |        |      |
| Delta-5 desaturase activity               |               |               |               |      |               |               |               |        |               |               |               |        |      |
| Mean ± SD                                 | 3.88 ± 1.58   | 4.26 ± 2.00   | 0.38 ± 1.84   | 0.71 | 4.05 ± 1.60   | 4.14 ± 1.26   | 0.10 ± 1.21   | 0.37   | 4.20 ± 1.53   | 4.19 ± 1.66   | -0.01 ± 1.37  | 0.90   | 0.91 |
| 95% CI                                    | 3.27 – 4.48   | 3.49 – 5.03   | -0.32 – 1.09  |      | 3.44 – 4.65   | 3.67 – 4.62   | -0.36 – 0.55  |        | 3.62 – 4.78   | 3.56 – 4.82   | -0.52 – 0.51  |        |      |
| CV (%)                                    | 40.70         | 46.92         |               |      | 39.51         | 30.50         |               |        | 36.39         | 39.70         |               |        |      |
| Delta-6 desaturase activity               |               |               |               |      |               |               |               |        |               |               |               |        |      |
| Mean ± SD                                 | 0.13 ± 0.05   | 0.12 ± 0.04   | -0.01 ± 0.04  | 0.39 | 0.14 ± 0.06   | 0.12 ± 0.05   | -0.01 ± 0.04  | 0.09   | 0.12 ± 0.05   | 0.12 ± 0.04   | 0.001 ± 0.04  | 0.98   | 0.95 |
| 95% CI                                    | 0.12 – 0.15   | 0.10 – 0.14   | -0.03 – 0.003 |      | 0.11 – 0.16   | 0.10 – 0.14   | -0.03 – 0.002 |        | 0.10 – 0.14   | 0.10 – 0.13   | -0.01 – 0.02  |        |      |
| CV (%)                                    | 34.48         | 37.27         |               |      | 42.51         | 39.40         |               |        | 40.01         | 34.47         |               |        |      |

Values are mean ± standard deviation (SD), 95% confidence interval (CI) and coefficient of variation (CV). Change ( $\Delta$ ) is post-baseline. Intragroup (IG) differences were estimated by the non-parametric Wilcoxon test and between groups (BG) differences were estimated by the non-parametric Kruskal-Wallis test. All the *p*-values are indicated.

**Table S7.** Habitual daily intake of total energy, main nutrients and fatty acids of the sample population included in the study and distributed into the placebo (PLB) and chokeberry (AMJ and AMJ<sub>a</sub>) intervention groups.

|                                        | PLB (n=29)        | AMJ (n=27)        | AMJ <sub>a</sub> (n=28) | <i>p</i> -value<br>(between groups) |
|----------------------------------------|-------------------|-------------------|-------------------------|-------------------------------------|
| <b>Energy (Kcal)</b>                   |                   |                   |                         |                                     |
| Mean ± SD                              | 2075.09 ± 597.27  | 2055.30 ± 499.27  | 2015.90 ± 555.04        |                                     |
| Median                                 | 2087.48           | 1901.62           | 1931.40                 | 0.94                                |
| 95% CI                                 | 1853.86 – 2296.32 | 1866.98 – 2243.63 | 1806.53 – 2225.26       |                                     |
| CV (%)                                 | 28.78             | 24.29             | 27.53                   |                                     |
| <b>Main macronutrients</b>             |                   |                   |                         |                                     |
| <b>Fat (g)</b>                         |                   |                   |                         |                                     |
| Mean ± SD                              | 95.26 ± 33.01     | 89.25 ± 28.83     | 94.15 ± 33.84           |                                     |
| Median                                 | 97.30             | 81.21             | 86.57                   | 0.81                                |
| 95% CI                                 | 83.04 – 107.49    | 78.37 – 100.12    | 81.38 – 106.92          |                                     |
| CV (%)                                 | 34.65             | 32.30             | 35.95                   |                                     |
| <b>Protein (g)</b>                     |                   |                   |                         |                                     |
| Mean ± SD                              | 82.05 ± 25.24     | 80.81 ± 21.48     | 79.82 ± 24.81           |                                     |
| Median                                 | 86.65             | 76.96             | 75.31                   | 0.86                                |
| 95% CI                                 | 72.70 – 91.40     | 72.71 – 88.91     | 70.46 – 89.18           |                                     |
| CV (%)                                 | 30.77             | 26.58             | 31.08                   |                                     |
| <b>Carbohydrates (g)</b>               |                   |                   |                         |                                     |
| Mean ± SD                              | 222.38 ± 77.41    | 226.75 ± 68.25    | 212.31 ± 61.89          |                                     |
| Median                                 | 219.12            | 202.82            | 204.76                  | 0.82                                |
| 95% CI                                 | 193.71 – 251.05   | 201.01 – 252.49   | 188.97 – 235.66         |                                     |
| CV (%)                                 | 34.81             | 30.10             | 29.15                   |                                     |
| <b>Main types of fatty acids</b>       |                   |                   |                         |                                     |
| <b>Saturated fatty acids (g)</b>       |                   |                   |                         |                                     |
| Mean ± SD                              | 28.54 ± 11.17     | 30.22 ± 12.08     | 31.50 ± 13.73           |                                     |
| Median                                 | 29.45             | 27.52             | 28.78                   | 0.82                                |
| 95% CI                                 | 24.40 – 32.68     | 25.66 – 34.77     | 26.32 – 36.68           |                                     |
| CV (%)                                 | 39.14             | 39.98             | 43.58                   |                                     |
| <b>Monounsaturated fatty acids (g)</b> |                   |                   |                         |                                     |
| Mean ± SD                              | 30.13 ± 11.66     | 28.27 ± 10.44     | 29.28 ± 12.93           |                                     |
| Median                                 | 28.03             | 25.37             | 25.71                   | 0.84                                |
| 95% CI                                 | 25.81 – 34.45     | 24.33 – 32.21     | 24.40 – 34.15           |                                     |
| CV (%)                                 | 38.70             | 36.92             | 44.15                   |                                     |
| <b>Polyunsaturated fatty acids (g)</b> |                   |                   |                         |                                     |
| Mean ± SD                              | 26.86 ± 13.67     | 22.29 ± 8.88      | 23.86 ± 8.63            |                                     |
| Median                                 | 24.23             | 20.05             | 23.83                   | 0.60                                |
| 95% CI                                 | 21.80 – 31.93     | 18.94 – 25.64     | 20.60 – 27.12           |                                     |
| CV (%)                                 | 50.89             | 39.82             | 36.19                   |                                     |

Values are mean ± standard deviation (SD), median, 95% confidence interval (CI) and coefficient of variation (CV). Between groups differences were estimated by the non-parametric test of Kruskal-Wallis. All the *p*-values are indicated.
